# Supplementary material for: A density model for screening hydrogen bond donors to improve the efficiency of hydrophobic deep eutectic solvents
Source: Royal Society of Chemistry journal article supplement (doi:10.1039/d3nj05094g), 2023-12-22
Supplement: d3nj05094g1.pdf [file d3nj05094g1.pdf]

## Supporting Information

### **A density model for screening hydrogen bond donors to improve the efficiency of hydrophobic deep eutectic solvents<sup>†</sup>**

**Chengjin Xu<sup>b</sup>, Hongfei Wang<sup>a\*</sup>**

*<sup>a</sup> Institute for Smart Materials & Engineering, University of Jinan, Jinan 250022, PR  
China*

*<sup>b</sup> School of Chemistry and Chemical Engineering, Shaanxi University of Science and  
Technology, Xi'an 710021, PR China*

## Table of Contents

**Table S1** 4 HDES systems for the extraction of metal.

**Table S2** 5 HDES systems for the extraction of organic compounds.

**Table S3** 6 HDES systems for the extraction of organic compounds.

**Table S1** 4 HDES systems for the extraction of metal\*.<sup>1-5</sup>

| System 1–Pt(IV)                  |                                |             |                             |            |
|----------------------------------|--------------------------------|-------------|-----------------------------|------------|
| HBA                              | HBD                            | Molar ratio | $\rho$ (g/cm <sup>3</sup> ) | $\eta$ (%) |
| trioctylphosphine oxide          | 1-Butanol                      | 1:1         | 0.810                       | 98.0       |
|                                  | 1-Hexanol                      | 1:1         | 0.814                       | 97.2       |
|                                  | 1-Octanol                      | 1:1         | 0.827                       | 89.0       |
|                                  | L-Menthol                      | 1:1         | 0.890                       | 94.1       |
|                                  | 1-Hexanoic acid                | 1:1         | 0.927                       | 82.4       |
| System 2–Cr(VI)                  |                                |             |                             |            |
| HBA                              | HBD                            | Molar ratio | $\rho$ (g/cm <sup>3</sup> ) | $\eta$ (%) |
| Trioctylmethyl ammonium chloride | 2-Ethylhexyl 4-hydroxybenzoate | 1:1         | 1.035                       | 98.3       |
|                                  | n-Octyl 4-hydroxybenzoate      | 1:1         | 1.037                       | 96.8       |
|                                  | Isobutyl 4-hydroxybenzoate     | 1:1         | 1.105                       | 91.3       |
|                                  | Butyl 4-hydroxybenzoate        | 1:1         | 1.280                       | 82.4       |
|                                  | Butyl 4-hydroxybenzoate        | 1:1         | 1.460                       | 66.0       |
| System 3–Co(II)                  |                                |             |                             |            |
| HBA                              | HBD                            | Molar ratio | $\rho$ (g/cm <sup>3</sup> ) | $\eta$     |
| Trioctylmethyl ammonium chloride | 1-Hexanol                      | 1:1         | 0.814                       | 10.1       |
|                                  | 1-Octanol                      | 1:1         | 0.827                       | 9.1        |
|                                  | 1-Decanol                      | 1:1         | 0.829                       | 8.2        |
|                                  | 1-Dodecanol                    | 1:1         | 0.833                       | 7.7        |
|                                  | 1-Dodecanol                    | 1:1         | 0.836                       | 7.1        |
| System 4–Ni(II)                  |                                |             |                             |            |
| HBA                              | HBD                            | Molar ratio | $\rho$ (g/cm <sup>3</sup> ) | $\eta$     |
| Trioctylmethyl ammonium chloride | 1-Hexanol                      | 1:1         | 0.814                       | 0.112      |
|                                  | 1-Octanol                      | 1:1         | 0.827                       | 0.108      |
|                                  | 1-Decanol                      | 1:1         | 0.829                       | 0.099      |
|                                  | 1-Dodecanol                    | 1:1         | 0.833                       | 0.094      |
|                                  | 1-Tetradecanol                 | 1:1         | 0.836                       | 0.088      |

\*All systems are at room temperature.

**Table S2** 5 HDES systems for the extraction of organic compounds\*.<sup>4-7</sup>

| System 1–Artemisinin             |                        |             |                             |               |
|----------------------------------|------------------------|-------------|-----------------------------|---------------|
| HBA                              | HBD                    | Molar ratio | $\rho$ (g/cm <sup>3</sup> ) | $\eta$ (mg/g) |
| Trioctylmethyl ammonium chloride | 1-Propanol             | 1:2         | 0.804                       | 1.48 ± 0.07   |
|                                  | 1-Butanol              | 1:2         | 0.810                       | 1.63 ± 0.03   |
|                                  | 1-Hexanol              | 1:2         | 0.814                       | 1.48 ± 0.07   |
|                                  | 1-Octanol              | 1:2         | 0.827                       | 1.37 ± 0.02   |
|                                  | L-Menthol              | 1:2         | 0.890                       | 0.98 ± 0.03   |
|                                  | 1-Decanol              | 1:2         | 0.829                       | 1.26 ± 0.06   |
|                                  | 1-Dodecanol            | 1:2         | 0.833                       | 1.26 ± 0.07   |
|                                  | 1-Tetradecanol         | 1:2         | 0.836                       | 1.16 ± 0.05   |
|                                  | Cyclohexanol           | 1:2         | 0.948                       | 1.07 ± 0.05   |
|                                  | 1,2-Butanediol         | 1:2         | 1.006                       | 1.42 ± 0.06   |
|                                  | 1,3-Propylene glycol   | 1:2         | 1.053                       | 1.42 ± 0.01   |
|                                  | Ethylene glycol        | 1:2         | 1.113                       | 1.36 ± 0.06   |
|                                  | Elycerol               | 1:2         | 1.250                       | 1.28 ± 0.02   |
| System 2–Ciprofloxacin           |                        |             |                             |               |
| HBA                              | HBD                    | Molar ratio | $\rho$ (g/cm <sup>3</sup> ) | $\eta$ (%)    |
| Tetrabutylammonium bromide       | 1-Butanol              | 1:1         | 0.810                       | 56.3 ± 2.4    |
|                                  | 1-Octanol              | 1:1         | 0.827                       | 64.2 ± 2.1    |
|                                  | 1-Dodecanol            | 1:1         | 0.833                       | 61.1 ± 2.1    |
|                                  | 1-Octanoic acid        | 1:1         | 0.907                       | 55.0 ± 1.1    |
|                                  | Oleyl alcohol          | 1:1         | 0.849                       | 62.4 ± 1.3    |
|                                  | Hexanoic acid          | 1:1         | 0.927                       | 38.0 ± 2.1    |
|                                  | Decanoic acid          | 1:1         | 0.893                       | 45.0 ± 3.2    |
|                                  | System 3–Ciprofloxacin |             |                             |               |
| HBA                              | HBD                    | Molar ratio | $\rho$ (g/cm <sup>3</sup> ) | $\eta$ (%)    |
| Tetrabutylammonium bromide       | 1-Butanol              | 1:1         | 0.810                       | 73.2 ± 2.3    |
|                                  | 1-Octanol              | 1:1         | 0.827                       | 81.9 ± 1.8    |
|                                  | 1-Dodecanol            | 1:1         | 0.833                       | 75.3 ± 1.8    |
|                                  | 1-Octanoic acid        | 1:1         | 0.907                       | 70.3 ± 2.6    |
|                                  | Oleyl alcohol          | 1:1         | 0.849                       | 77.1 ± 2.7    |
|                                  | Hexanoic acid          | 1:1         | 0.927                       | 55.3 ± 3.1    |
|                                  | Decanoic acid          | 1:1         | 0.893                       | 60.3 ± 2.6    |
|                                  | System 4–Levofloxacin  |             |                             |               |
| HBA                              | HBD                    | Molar ratio | $\rho$ (g/cm <sup>3</sup> ) | $\eta$ (%)    |
| Trioctylmethyl ammonium chloride | 1-Butanol              | 1:1         | 0.810                       | 68.7 ± 1.1    |
|                                  | 1-Octanol              | 1:1         | 0.827                       | 78.4 ± 2.2    |

|                                     |                 |             |                             |            |
|-------------------------------------|-----------------|-------------|-----------------------------|------------|
|                                     | 1-Dodecanol     | 1:1         | 0.833                       | 74.2 ± 2.7 |
|                                     | 1-Octanoic acid | 1:1         | 0.907                       | 66.2 ± 3.6 |
|                                     | Oleyl alcohol   | 1:1         | 0.849                       | 76.1 ± 1.6 |
|                                     | Hexanoic acid   | 1:1         | 0.927                       | 55.3 ± 3.1 |
|                                     | Decanoic acid   | 1:1         | 0.893                       | 59.0 ± 2.6 |
| <b>System 5–Levofloxacin</b>        |                 |             |                             |            |
| HBA                                 | HBD             | Molar ratio | $\rho$ (g/cm <sup>3</sup> ) | $\eta$ (%) |
| Trioctylmethyl<br>ammonium chloride | 1-Butanol       | 1:1         | 0.810                       | 78.2 ± 1.6 |
|                                     | 1-Octanol       | 1:1         | 0.827                       | 84.5 ± 0.8 |
|                                     | 1-Dodecanol     | 1:1         | 0.833                       | 79.0 ± 2.1 |
|                                     | 1-Octanoic acid | 1:1         | 0.907                       | 75.5 ± 2.4 |
|                                     | Oleyl alcohol   | 1:1         | 0.849                       | 80.0 ± 1.9 |
|                                     | Hexanoic acid   | 1:1         | 0.927                       | 59.2 ± 2.9 |
|                                     | Decanoic acid   | 1:1         | 0.893                       | 65.3 ± 2.4 |

\*All systems are at room temperature.

**Table S3** 6 HDES systems for the extraction of organic compounds\*.<sup>4,5,8</sup>

| System 1–PFOA      |                             |        | System 2–PFOS      |        |
|--------------------|-----------------------------|--------|--------------------|--------|
| HBDs               | $\rho$ (g/cm <sup>3</sup> ) | $\eta$ | HBDs               | $\eta$ |
| 1-Hexadecanol      | 0.838                       | 4.466  | 1-Hexadecanol      | 5.624  |
| 1-Tetradecanol     | 0.836                       | 4.518  | 1-Tetradecanol     | 5.679  |
| Dodecanol          | 0.833                       | 4.560  | Dodecanol          | 5.72   |
| 1-Undecanol        | 0.830                       | 4.610  | 1-Undecanol        | 5.778  |
| 1-Decanol          | 0.829                       | 4.628  | 1-Decanol          | 5.791  |
| 1-Nonanol          | 0.828                       | 4.674  | 1-Nonanol          | 5.843  |
| 1-Octanol          | 0.827                       | 4.691  | 1-Octanol          | 5.855  |
| Oleyl alcohol      | 0.849                       | 4.389  | Oleyl alcohol      | 5.499  |
| 1-Heptanol         | 0.822                       | 4.692  | 1-Heptanol         | 5.848  |
| Cinnamyl alcohol   | 1.044                       | 4.198  | Cinnamyl alcohol   | 5.145  |
| Cyclohexanol       | 0.948                       | 4.360  | Cyclohexanol       | 5.438  |
| 2-Phenylethanol    | 1.020                       | 4.149  | 2-Phenylethanol    | 5.088  |
| System 3–PFOA      |                             |        | System 4–PFOS      |        |
| HBDs               | $\rho$ (g/cm <sup>3</sup> ) | $\eta$ | HBDs               | $\eta$ |
| Ricinoleic acid    | 0.940                       | 4.240  | Ricinoleic acid    | 5.216  |
| Decanoic acid      | 0.918                       | 4.012  | Decanoic acid      | 4.793  |
| Dodecanoic acid    | 0.883                       | 3.993  | Dodecanoic acid    | 4.694  |
| Nonanoic acid      | 0.906                       | 4.033  | Nonanoic acid      | 4.816  |
| Undecanoic acid    | 0.890                       | 3.963  | Undecanoic acid    | 4.727  |
| Caprylic acid      | 0.907                       | 4.059  | Caprylic acid      | 4.848  |
| 10-Undecenoic-acid | 0.912                       | 3.975  | 10-Undecenoic-acid | 4.728  |
| Tetradecanoic acid | 0.862                       | 3.852  | Tetradecanoic acid | 4.591  |
| Hexadecanoic acid  | 0.852                       | 3.787  | Hexadecanoic acid  | 4.518  |
| n-Heptanoic acid   | 0.918                       | 4.041  | n-Heptanoic acid   | 4.827  |
| n-Hexanoic acid    | 0.927                       | 3.955  | n-Hexanoic acid    | 4.729  |
| Benzoic acid       | 1.080                       | 3.337  | Benzoic acid       | 3.943  |
| System 5–PFOA      |                             |        | System 6–PFOS      |        |
| HBDs               | $\rho$ (g/cm <sup>3</sup> ) | $\eta$ | HBDs               | $\eta$ |
| 4-Methylphenol     | 1.034                       | 3.434  | 4-Methylphenol     | 3.982  |
| Phenylacetic acid  | 1.091                       | 3.197  | Phenylacetic acid  | 3.776  |
| 4-Ethylphenol      | 1.011                       | 3.622  | 4-Ethylphenol      | 4.199  |
| 4-Propylphenol     | 0.983                       | 3.705  | 4-Propylphenol     | 4.292  |
| 2-Methylphenol     | 1.048                       | 3.499  | 2-Methylphenol     | 4.037  |
| Methylsalicylate   | 1.147                       | 3.169  | Methylsalicylate   | 3.837  |

\*All systems are at room temperature.

## References

- 1 R. H. Liu, Y. Q. Geng, Z. J. Tian, N. Wang, M. Wang, G. J. Zhang and Y. Z. Yang, *Hydrometallurgy*, 2021, **199**, 105521.
- 2 Y. Y. Shi, D. Z. Xiong, Y. Y. Zhao, T. M. Li, K. G. Zhang and J. Fan, *Chemosphere*, 2020, **241**, 125082.
- 3 X. H. He, H. F. Xiao and L. B. Li, *Chem. Ind. Eng.*, 2023, **40**, 68–74.
- 4 *Chemical Book*, Density for some liquids, <http://www.chemicalbook.com>.
- 5 *Chemsrc*, Density for some liquids, <http://www.chemsrc.com>.
- 6 J. Cao, M. Yang, F. Cao, J. H. Wang and E. Z. Su, *ACS Sustainable Chem. Eng.*, 2017, **5**, 3270–3278.
- 7 W. Y. Tang, Y. L. Dai and K. H. Row, *Anal. Bioanal. Chem.*, 2018, **410**, 7325–7336.
- 8 S. Eid, A. S. Darwish, T. Lemaoui, F. Banat, S. W. Hasan and I. M. AlNashef, *J. Mol. Liq.*, 2023, **382**, 121996.
